# Supplementary material
Source: PubMed Central journal article supplement (PMC4816137)
Supplement: cr2015150x3.pdf [file cr2015150x3.pdf]

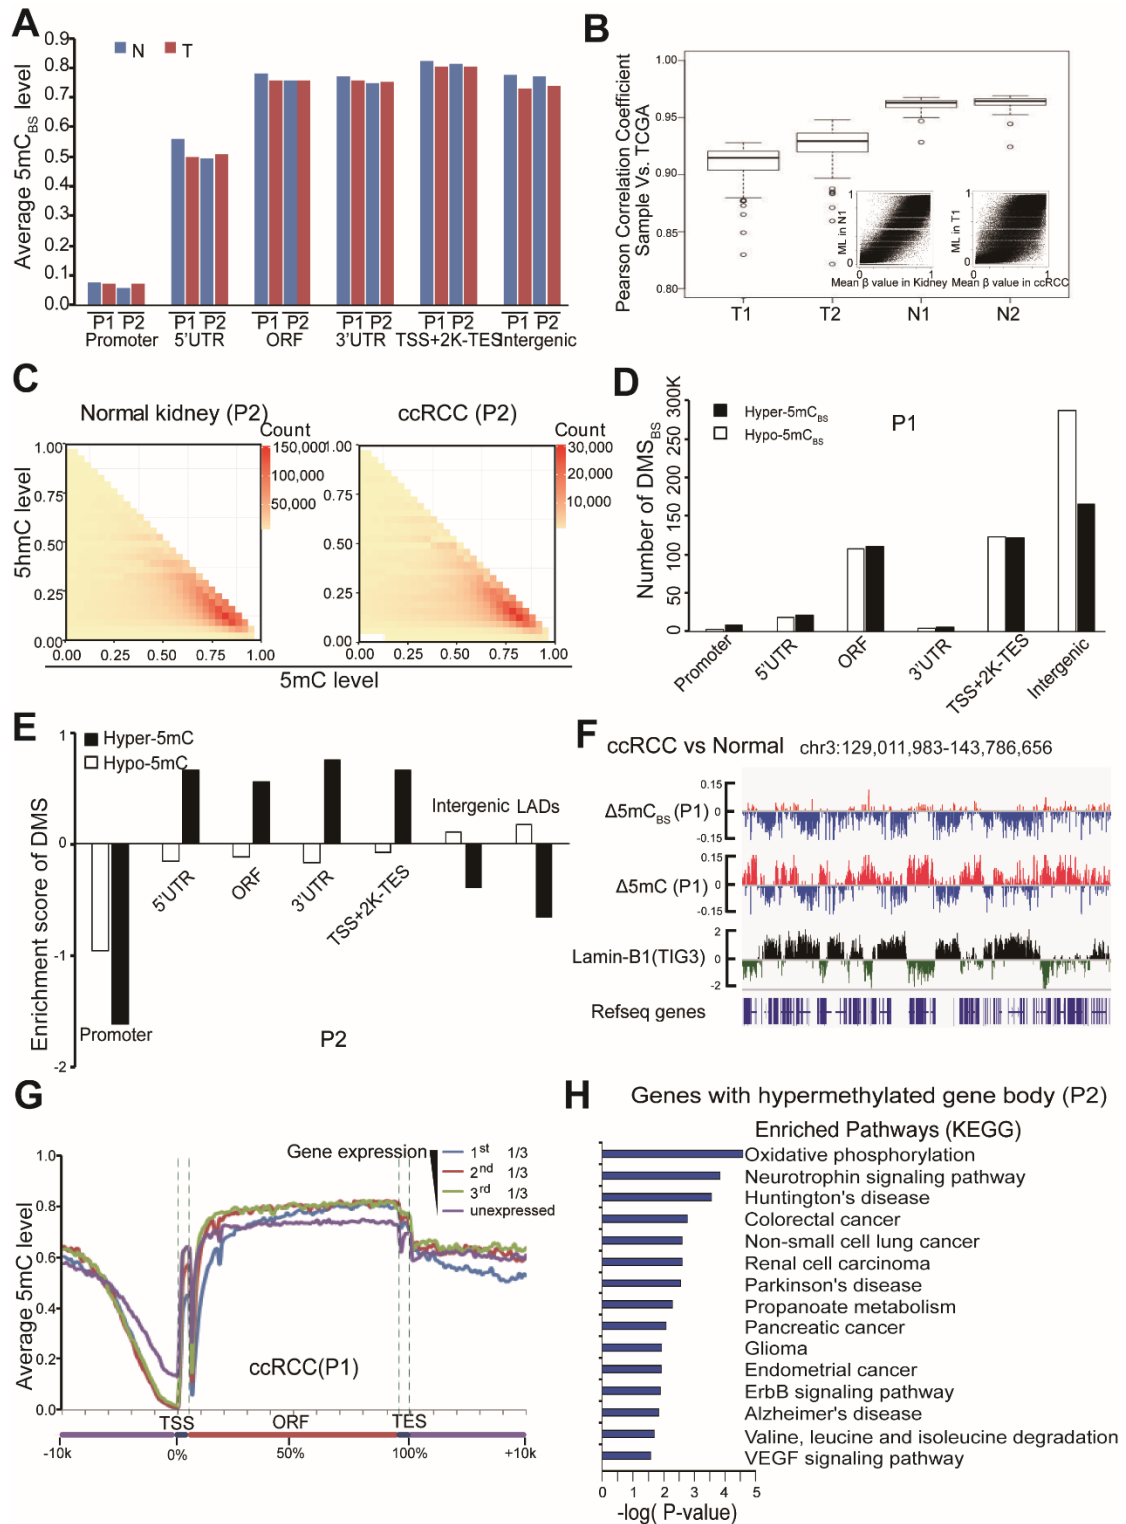

**Supplementary information, Figure S3** Genome-wide single nucleotide resolution mapping of 5mC by combing BS-seq and TAB-seq method. (A) Global changes of average 5mC levels in different genomic elements for the tumor and matched normal tissues. 5mC<sub>BS</sub> was estimated from BS-Seq (5hmC+5mC). (B) The box plot showed the distribution of Pearson correlation coefficients between our indicated sample and 160 samples from TCGA data. The 160 paired normal and tumor KIRC-HumanMethylation-450K data were downloaded from TCGA website. The dot plot represents the association between the methylation level of our sample and the mean  $\beta$  values of 160 indicated samples from TCGA. (C) Heatmap of estimated abundances of 5mC at 5hmC modified sites in tumor and matched normal tissue. The scale bar from yellow to red represents the number of 5mC/5hmC modified sites from low to high. X and Y axis showed the 5mC and 5hmC level of those modified sites, respectively. (D)

The distributions of the differentially methylated sites (DMS<sub>BS</sub>) in different gene-associated genetic elements (promoter defined as  $\pm 500$ bp of TSS). 5mC<sub>BS</sub> represents the 5mC level estimated from BS-seq data. **(E)** The enrichment scores of DMS in different genomic elements. LADs represent nuclear lamina-associated domains in TIG3 fibroblast cells. **(F)** A representative 15-Mb region on chromosome 3q showing substantial overlap between kidney tumor hypomethylated regions and LAD regions. Lamin-B1 track is from the UCSC annotation database. 5mC<sub>BS</sub> represents the methylation level from BS-seq only. **(G)** The average 5mC level in ccRCC tissue throughout different gene-associated regions. Genes in the analyzed sample were divided into four groups according to gene expression level (FPKM value). **(H)** The KEGG pathways analyses with the genes that gain of methylation in gene body regions during tumorigenesis. P1 and P2 represent patient 1 and 2, respectively. T and N represent tumor and matched normal tissue, respectively.
