# Supplementary material
Source: PubMed Central journal article supplement (PMC4816137)
Supplement: cr2015150x6.pdf [file cr2015150x6.pdf]

**Supplementary information, Table S1** Summary of single-base 5hmC sequencing using TAB-seq.

|                                             | Patient 1        |                | Patient 2        |                  |
|---------------------------------------------|------------------|----------------|------------------|------------------|
|                                             | Normal           | ccRCC          | Normal           | ccRCC            |
| <b>glucosylation protection rate</b>        | <b>95.88%</b>    | <b>95.58%</b>  | <b>94.89%</b>    | <b>95.33%</b>    |
| <b>Bisulfite conversion rate</b>            | <b>99.11%</b>    | <b>99.20%</b>  | <b>99.53%</b>    | <b>99.51%</b>    |
| <b>Tet oxidization rate</b>                 | <b>96.52%</b>    | <b>95.35%</b>  | <b>98.18%</b>    | <b>97.95%</b>    |
| <b>Mapped depth</b>                         | <b>33</b>        | <b>34</b>      | <b>35</b>        | <b>30</b>        |
| <b>#Cytosines covered &gt; 5X</b>           | <b>27.16M</b>    | <b>27.12M</b>  | <b>23.46M</b>    | <b>22.01M</b>    |
| <b>Average 5hmC level</b>                   | <b>7.07%</b>     | <b>1.93%</b>   | <b>6.96 %</b>    | <b>1.52%</b>     |
| <b>#5hmC modified sites</b>                 | <b>6,412,879</b> | <b>285,918</b> | <b>6,757,760</b> | <b>1,323,254</b> |
| <b>#hypo-5hmC sites (ccRCC vs. normal)</b>  | <b>3,163,758</b> |                | <b>3,442,630</b> |                  |
| <b>#hyper-5hmC sites (ccRCC vs. normal)</b> | <b>222,824</b>   |                | <b>659,608</b>   |                  |

Both bisulfite conversion rate and oxidation rate by Tet was calculated by *M. SsI* treated spiked lambda DNA. Average 5hmC levels for all CG sites is calculated as C/(C+T), then corrected with the following formula:  $5hmC\%_{corrected} = 5hmC\%_{measured} / \text{protection rate of } 5hmC-5mC_{BS-seq} * (1 - \text{Tet oxidization rate}_{5mC \text{ to } 5caU/T})$ . Hypo and hyper represent 5hmC level for the tumor tissue is lower or higher than that in normal tissue, respectively. "M" means million. # represents the number.
