# Supplementary material
Source: PubMed Central journal article supplement (PMC4816137)
Supplement: cr2015150x7.pdf [file cr2015150x7.pdf]

**Supplementary information, Table S2** Summary of RNA-seq.

|                  |               | <b>Total reads</b> | <b>Uniquely mapped reads</b> | <b>Uniquely mapped rate</b> |
|------------------|---------------|--------------------|------------------------------|-----------------------------|
| <b>Patient 1</b> | <b>Normal</b> | <b>76,073,808</b>  | <b>53,039,193</b>            | <b>69.72%</b>               |
|                  | <b>ccRCC</b>  | <b>78,465,446</b>  | <b>51,331,691</b>            | <b>65.42%</b>               |
| <b>Patient 2</b> | <b>Normal</b> | <b>80,348,492</b>  | <b>57,402,303</b>            | <b>71.44%</b>               |
|                  | <b>ccRCC</b>  | <b>104,481,634</b> | <b>66,394,548</b>            | <b>63.55%</b>               |

Uniquely mapped reads with mapping quality larger than or equal to 20 were used in the downstream analysis. Read counts per exon were obtained, followed by summarizing the read counts for all exons within a gene for all genes in UCSC HG19 RefGene table.
