# Supplementary material
Source: PubMed Central journal article supplement (PMC4816137)
Supplement: cr2015150x8.pdf [file cr2015150x8.pdf]

**Supplementary information, Table S3** Summary of shotgun bisulfite sequencing (BS-seq).

|                  |        | genome depths | BS-conversion rate | #CG (5x) | CG(5x)<br>covered | Average methylation level<br>(ML <sub>BS</sub> ) |
|------------------|--------|---------------|--------------------|----------|-------------------|--------------------------------------------------|
| <b>Patient 1</b> | Normal | 21            | 99.24%             | 26.86 M  | 95.25%            | 75.3%                                            |
|                  | ccRCC  | 25            | 99.07%             | 26.97M   | 95.64%            | 70.8%                                            |
| <b>Patient 2</b> | Normal | 23            | 99.69%             | 26.95M   | 95.55%            | 72.9%                                            |
|                  | ccRCC  | 25            | 99.71%             | 27.11 M  | 96.07%            | 71.1%                                            |

Paired-reads were mapped uniquely to the reference genome (HG19, USCS) by Bismark. #CpG (5x): total number of CpG sites mapped at least five reads. Covered: proportion of mapped CpG sites over total CpG sites in genome. "M" means million.
