# Supplementary material
Source: PubMed Central journal article supplement (PMC4816137)
Supplement: cr2015150x10.pdf [file cr2015150x10.pdf]

**Supplementary information, Table S5** Summary of DMS (differentially methylated sites).

|                  | <b>hypo-5mC</b> | <b>hyper-5mC</b> | <b>hypo-5mC<sub>BS</sub></b> | <b>hyper-5mC<sub>BS</sub></b> |
|------------------|-----------------|------------------|------------------------------|-------------------------------|
| <b>Patient 1</b> | <b>472,913</b>  | <b>415,632</b>   | <b>416,863</b>               | <b>303,633</b>                |
| <b>Patient 2</b> | <b>284,264</b>  | <b>287,106</b>   | <b>198,472</b>               | <b>135,684</b>                |

Hypo and hyper represent 5mC level for tumor tissue is lower or higher than that in normal tissue, respectively. Hypo-5mC<sub>BS</sub> and hyper-5mC<sub>BS</sub> are calculated by BS-seq data.
