# Supplementary material
Source: PubMed Central journal article supplement (PMC4816137)
Supplement: cr2015150x11.pdf [file cr2015150x11.pdf]

**Supplementary information, Table S6** The overlaps between aberrant 5hmC and 5mC changes at single nucleotide resolution during tumorigenesis.

|                  |                   | <b>hypo-5mC</b>            | <b>hyper-5mC</b>                  | <b>hypo-5mC<sub>BS</sub></b> | <b>hyper-5mC<sub>BS</sub></b> |
|------------------|-------------------|----------------------------|-----------------------------------|------------------------------|-------------------------------|
| <b>Patient 1</b> | <b>hypo-5hmC</b>  | 20,658<br>( <i>p</i> = 1 ) | 211,519<br>( <i>p</i> = 4.05E-67) | 63,124<br>( <i>p</i> = 1)    | 39,975<br>( <i>p</i> = 1)     |
|                  | <b>hyper-5hmC</b> | 9,285<br>( <i>p</i> = 1 )  | 2,733<br>( <i>p</i> = 1 )         | 2,389<br>( <i>p</i> = 1 )    | 5,215<br>( <i>p</i> = 1 )     |
| <b>Patient 2</b> | <b>hypo-5hmC</b>  | 9,516<br>( <i>p</i> = 1 )  | 230,341<br>( <i>p</i> = 0)        | 41,492<br>( <i>p</i> = 1)    | 16,463<br>( <i>p</i> = 1)     |
|                  | <b>hyper-5hmC</b> | 74,908<br>( <i>p</i> = 1 ) | 1,738<br>( <i>p</i> = 1 )         | 3,976<br>( <i>p</i> = 1 )    | 5,005<br>( <i>p</i> = 1)      |

Hypo and hyper represent 5hmC level for the tumor tissue is lower or higher than that in normal tissue, respectively. Hypo-5mC<sub>BS</sub> and hyper-5mC<sub>BS</sub> are calculated by BS-seq data. *P* value for the number of the overlapped sites was calculated using a custom script based on BEDTools fisher.
